# Supplementary material
Source: bioRxiv or medRxiv preprint supplement (https://www.biorxiv.org/highwire/filestream/33041/field_highwire_adjunct_files/4/099168-3.pdf)
Supplement: Supplementary file [file 099168-3.pdf]

**Supplementary Table 3**

Apollo tracks from genomics, transcriptomics and proteomics data

| <b>Category</b> | <b>Apollo tracks</b>               | <b>Description</b>                                                                                                        |
|-----------------|------------------------------------|---------------------------------------------------------------------------------------------------------------------------|
| Maker pipeline  | Maker                              | Maker gene predictions                                                                                                    |
|                 | Augustus                           | Ab-initio gene predictions                                                                                                |
|                 | SNAP                               | Ab-initio gene predictions                                                                                                |
|                 | Repeatmasker                       | Repeat annotations                                                                                                        |
|                 | Repeatrunner                       | Repeat annotations                                                                                                        |
|                 |                                    |                                                                                                                           |
| NCBI v100       | Genes                              | NCBI predicted protein coding genes                                                                                       |
|                 | ncRNA                              | NCBI predicted noncoding RNA                                                                                              |
|                 | Pseudogenes                        | NCBI Predicted pseudogenes                                                                                                |
|                 |                                    |                                                                                                                           |
| Transcriptomics | Adult                              | RNAseq from adult psyllid tissue. Mapped reads and coverage plot                                                          |
|                 | Egg                                | RNAseq from adult egg tissue. Mapped reads and coverage plot                                                              |
|                 | Nymph                              | RNAseq from adult nymph tissue. Mapped reads and coverage plot                                                            |
|                 | Healthy adult and nymph            | Data from Vyas 2015. Mapped reads and coverage plot                                                                       |
|                 | CLas infected adult and nymph      | Data from Vyas 2015. Mapped reads and coverage plot                                                                       |
|                 |                                    |                                                                                                                           |
| Proteomics      | Expressed protein tags (ePSTs)     | Peptides from mass spectrometry (MS) proteomics data from whole adult psyllid and percoll gradient fraction (Ramsey 2015) |
|                 | Reverse-translated peptides (RTPs) | Peptides from mass spectrometry (MS) proteomics data from whole adult psyllid and percoll gradient fraction (Ramsey 2015) |
|                 |                                    |                                                                                                                           |
| Genomics        | Paired-end DNaseq reads            | Mapped reads and coverage plot                                                                                            |
